# Supplementary material for: CriTER-A: A Novel Temperature-Dependent Noncoding RNA Switch in the Telomeric Transcriptome of Chironomus riparius
Source: Int J Mol Sci. 2021 Sep 24;22(19):10310. doi: 10.3390/ijms221910310 (PMC8508857; doi:10.3390/ijms221910310)
Supplement: Supplementary file 1 [file ijms-22-10310-s001.zip › ijms-1374470-supplementary.pdf]

Supplementary Material for

## CriTER-A: a novel temperature-dependent noncoding RNA switch in the telomeric transcriptome of *Chironomus riparius*

Cristina Romero-López <sup>1,\*</sup>, Alfredo Berzal-Herranz <sup>1</sup>, José Luis Martínez-Guitarte<sup>2</sup> and Mercedes de la Fuente <sup>3,\*</sup>

<sup>1</sup> Instituto de Parasitología y Biomedicina López-Neyra (IPBLN-CSIC), Av. Conocimiento 17, Armilla, 18016 Granada, Spain; CRL, [cristina\\_romero@ipb.csic.es](mailto:cristina_romero@ipb.csic.es); ABH, [aberzalh@ipb.csic.es](mailto:aberzalh@ipb.csic.es).

<sup>2</sup> Grupo de Biología y Toxicología Ambiental. Facultad de Ciencias. Universidad Nacional de Educación a Distancia (UNED), [jlmartinez@ccia.uned.es](mailto:jlmartinez@ccia.uned.es)

<sup>3</sup> Departamento de Ciencias y Técnicas Fisicoquímicas, Universidad Nacional de Educación a Distancia (UNED), Avda. de Esparta, s/n, 28230, Las Rozas, Spain, [mfuente@ccia.uned.es](mailto:mfuente@ccia.uned.es)

\* Correspondence: CRL, [cristina\\_romero@ipb.csic.es](mailto:cristina_romero@ipb.csic.es); MF, [mfuente@ccia.uned.es](mailto:mfuente@ccia.uned.es)

## **Content index**

This PDF file includes:

- **CriTER-A. Secondary Structure Prediction.** Includes **Figures S1 to S3.**
- **CriTER-B. Secondary Structure Prediction.** Includes **Figures S4 to S7.**

## CriTER-A. Secondary Structure Prediction

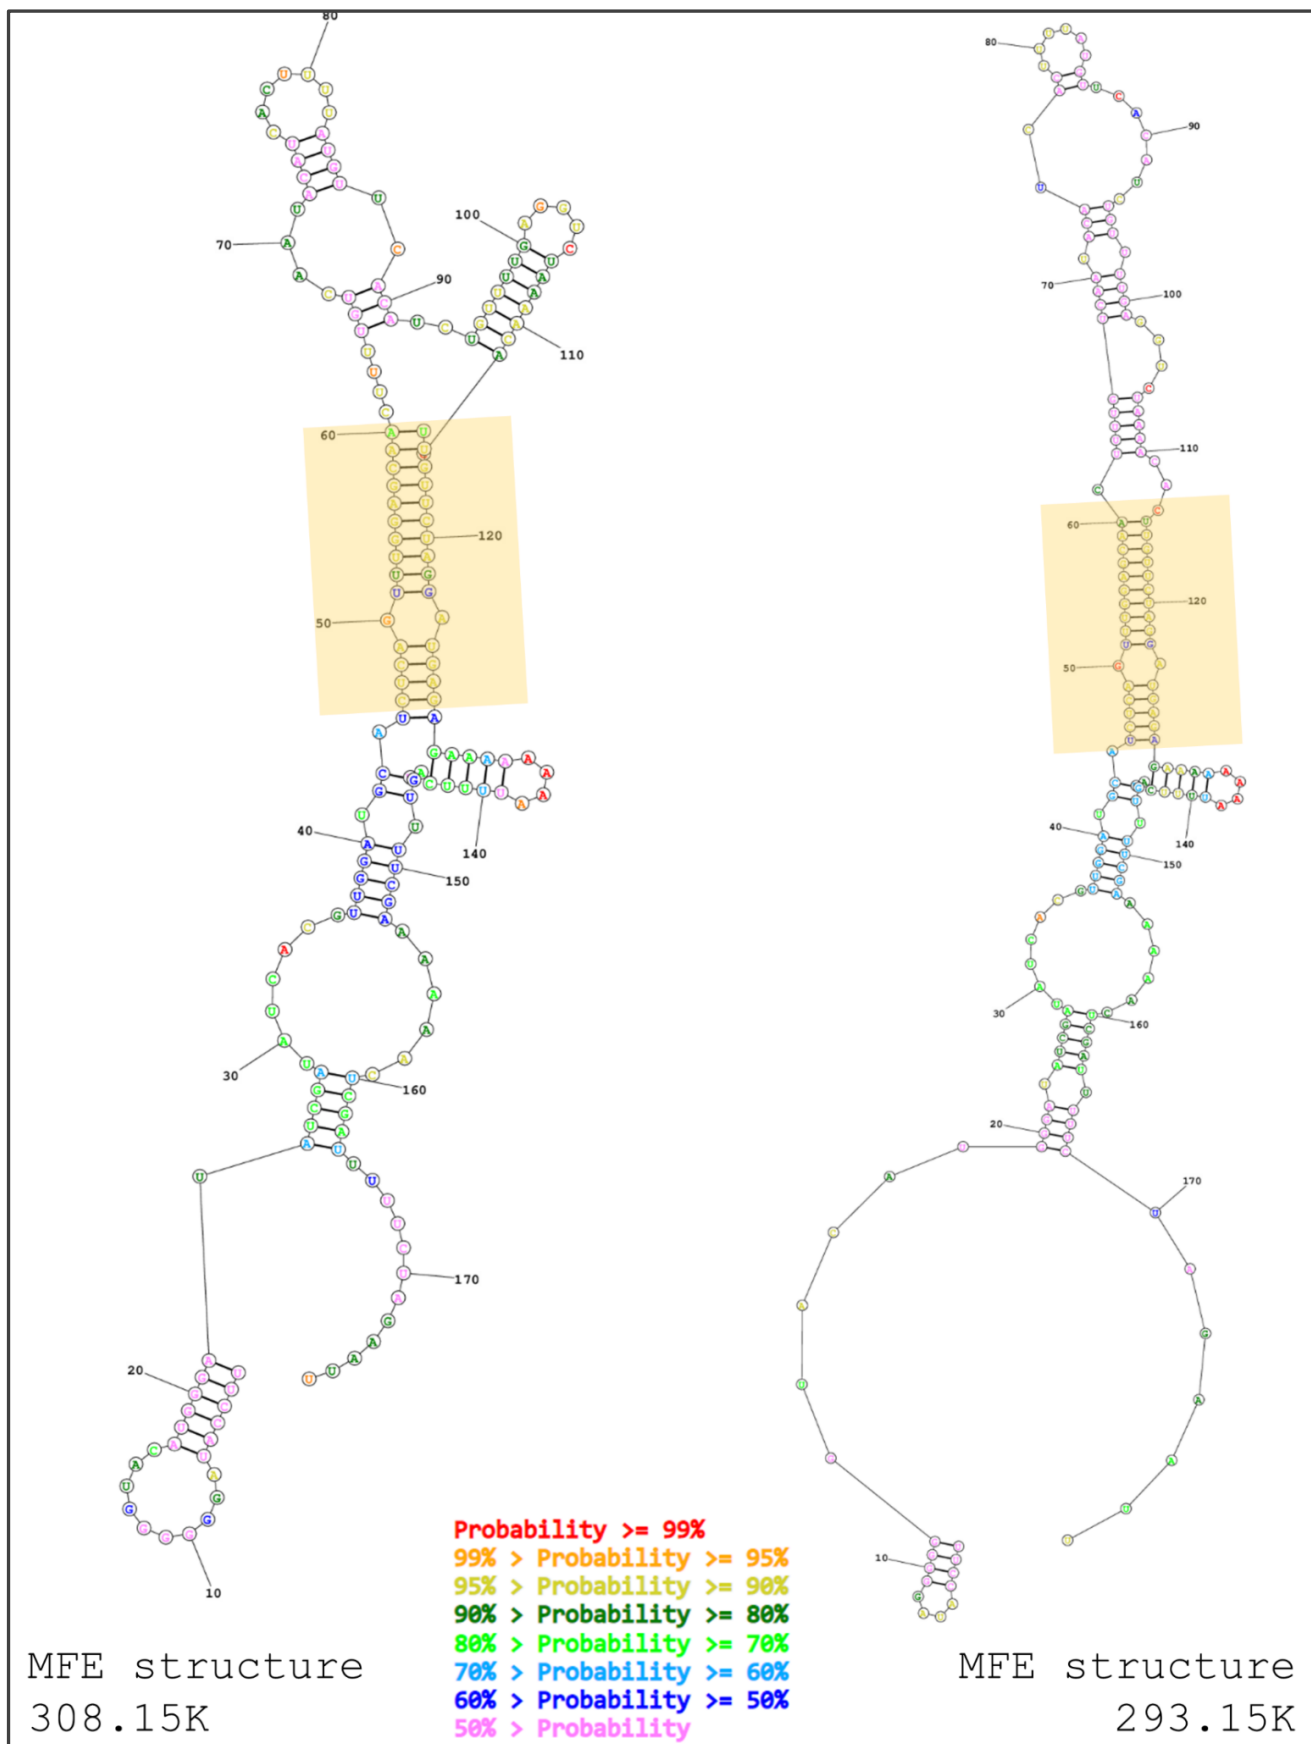

Figure S1. The minimum free energy (MFE) structure predicted for CriTER-A at 308,15 K (35°C) and 293,15 K (20°C). Calculations were performed with RNAstructure 6.3 using default parameters. The region involving high base pairing probabilities is highlighted (shadowed).

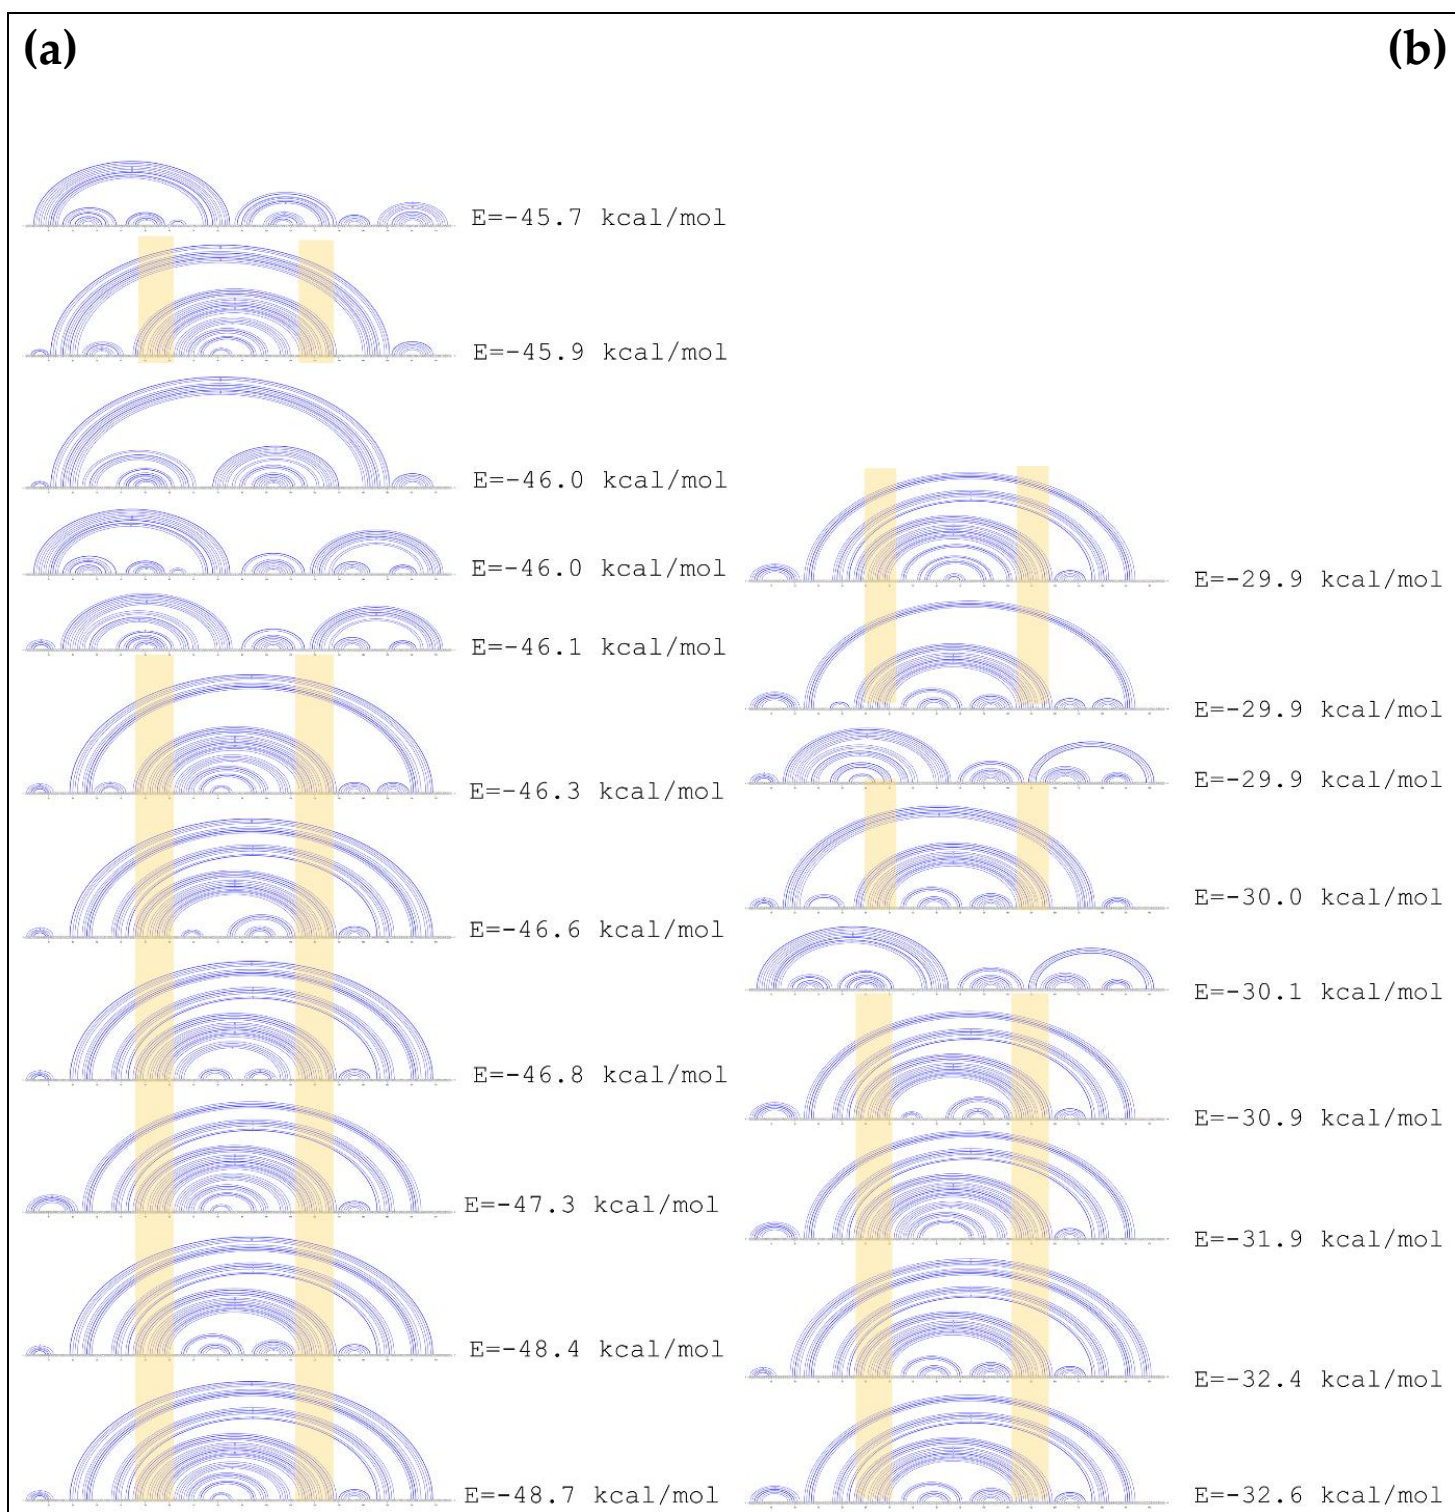

**Figure S2. Arc diagram of predicted MFE and suboptimal structures in a energy range of 3 kcal/mol for CrTER-A.** Calculations were performed with RNAStructure 6.3 using default parameters at (a) 293,15 K (20°C) and (b) 305,15 K (35°C). The region involving high base pairing probabilities is highlighted (shadowed).

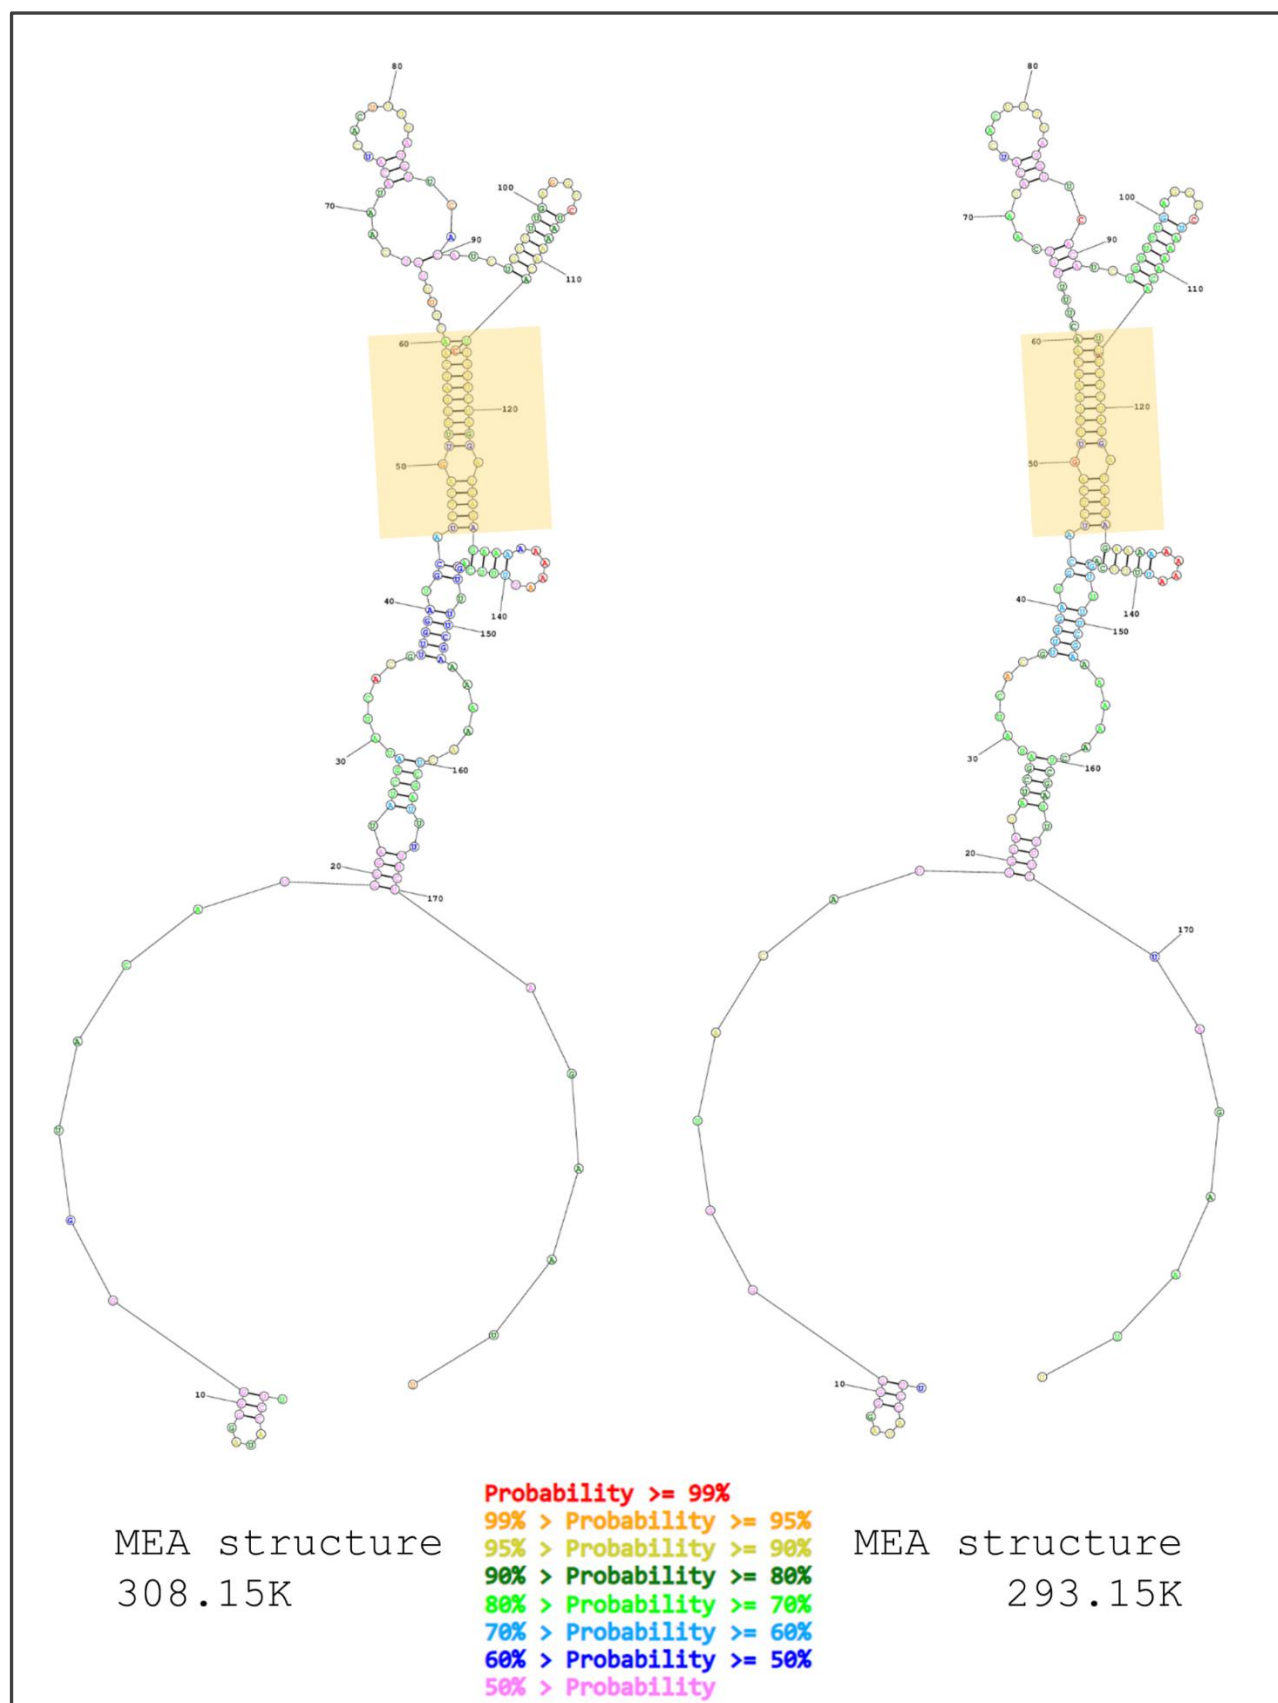

Figure S3. The maximum expected accuracy (MEA) structure predicted for CriTER-A at 308,15 K (35°C) and 293,15 K (20°C). Calculations were performed with RNAstructure 6.3 using default parameters. The region involving high base pairing probabilities is highlighted (shadowed).

## CriTER-B. Secondary Structure Prediction

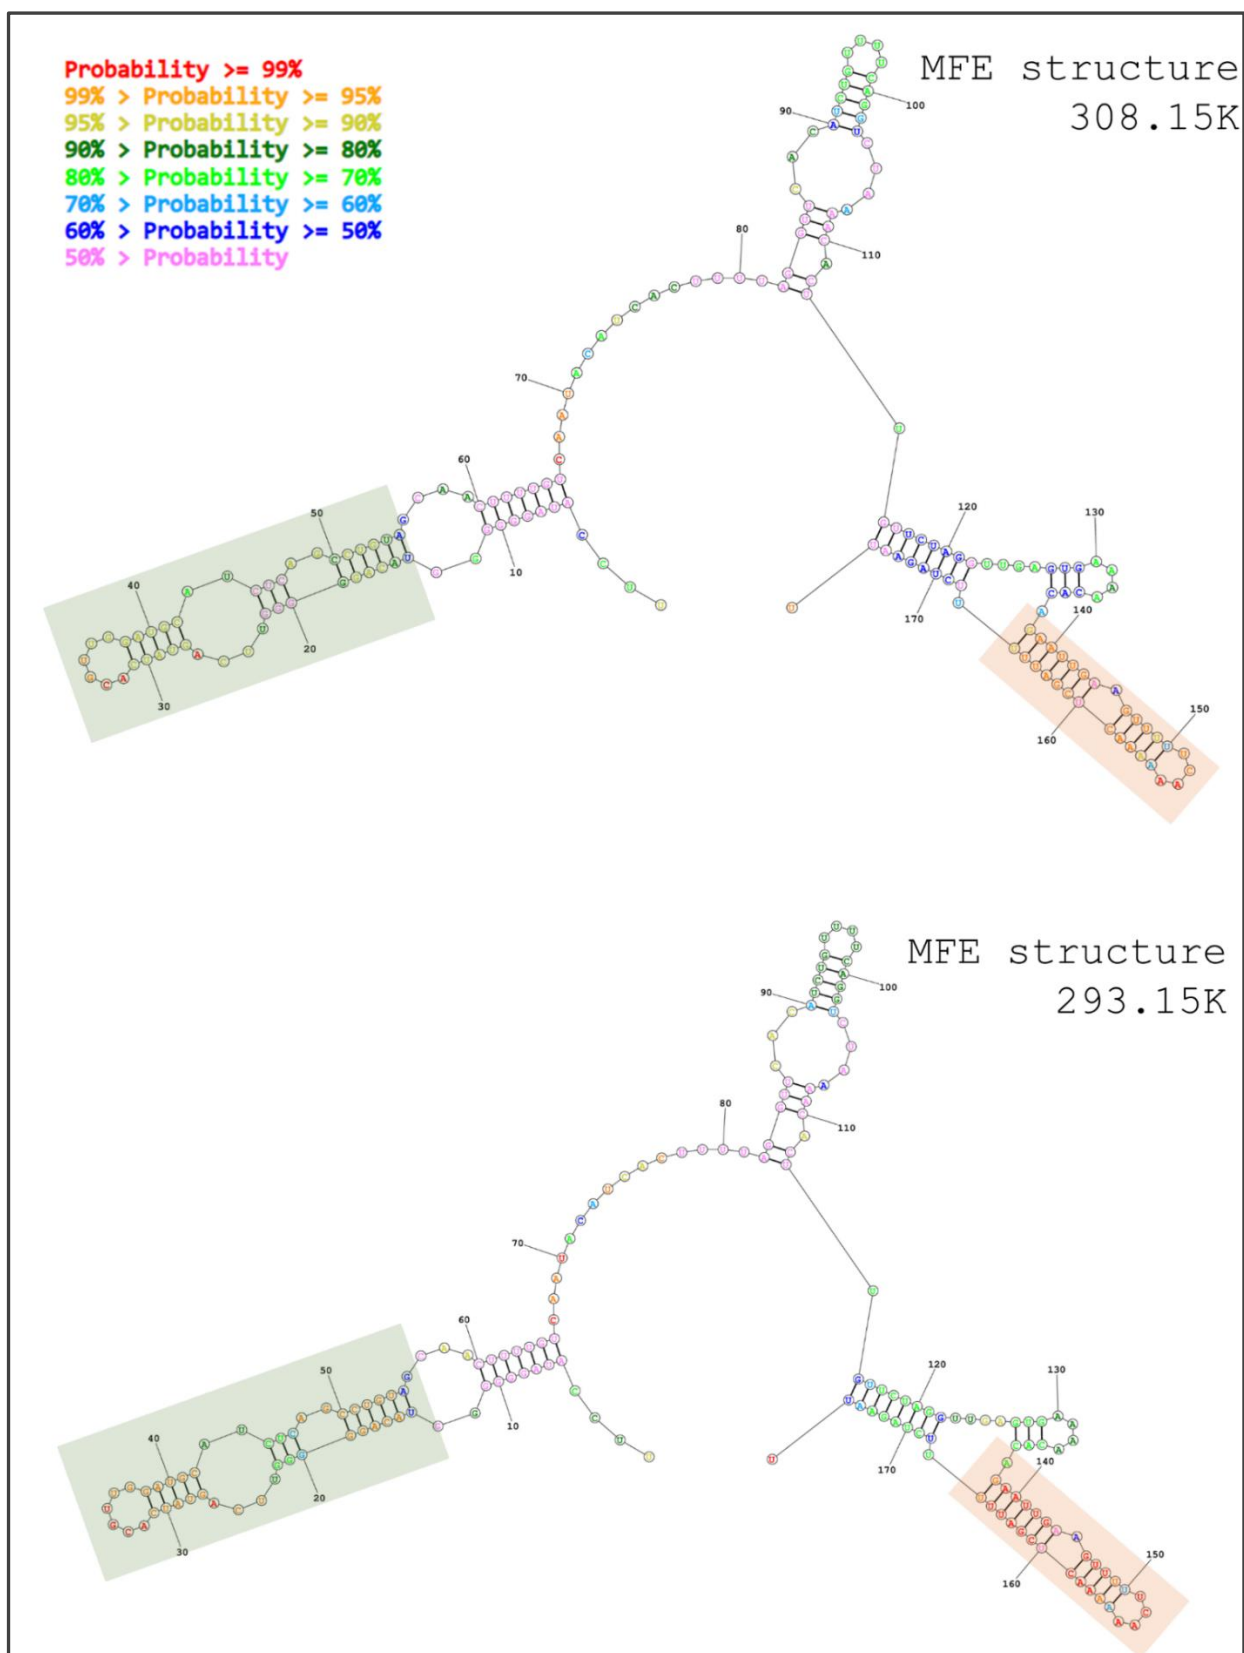

Figure S4. The minimum free energy (MFE) structure predicted for CriTER-B at 308,15 K (35°C) and 293,15 K (20°C). Calculations were performed with RNAstructure 6.3 using default parameters. The two stem-loops involving high base pairing probabilities are highlighted (shadowed).

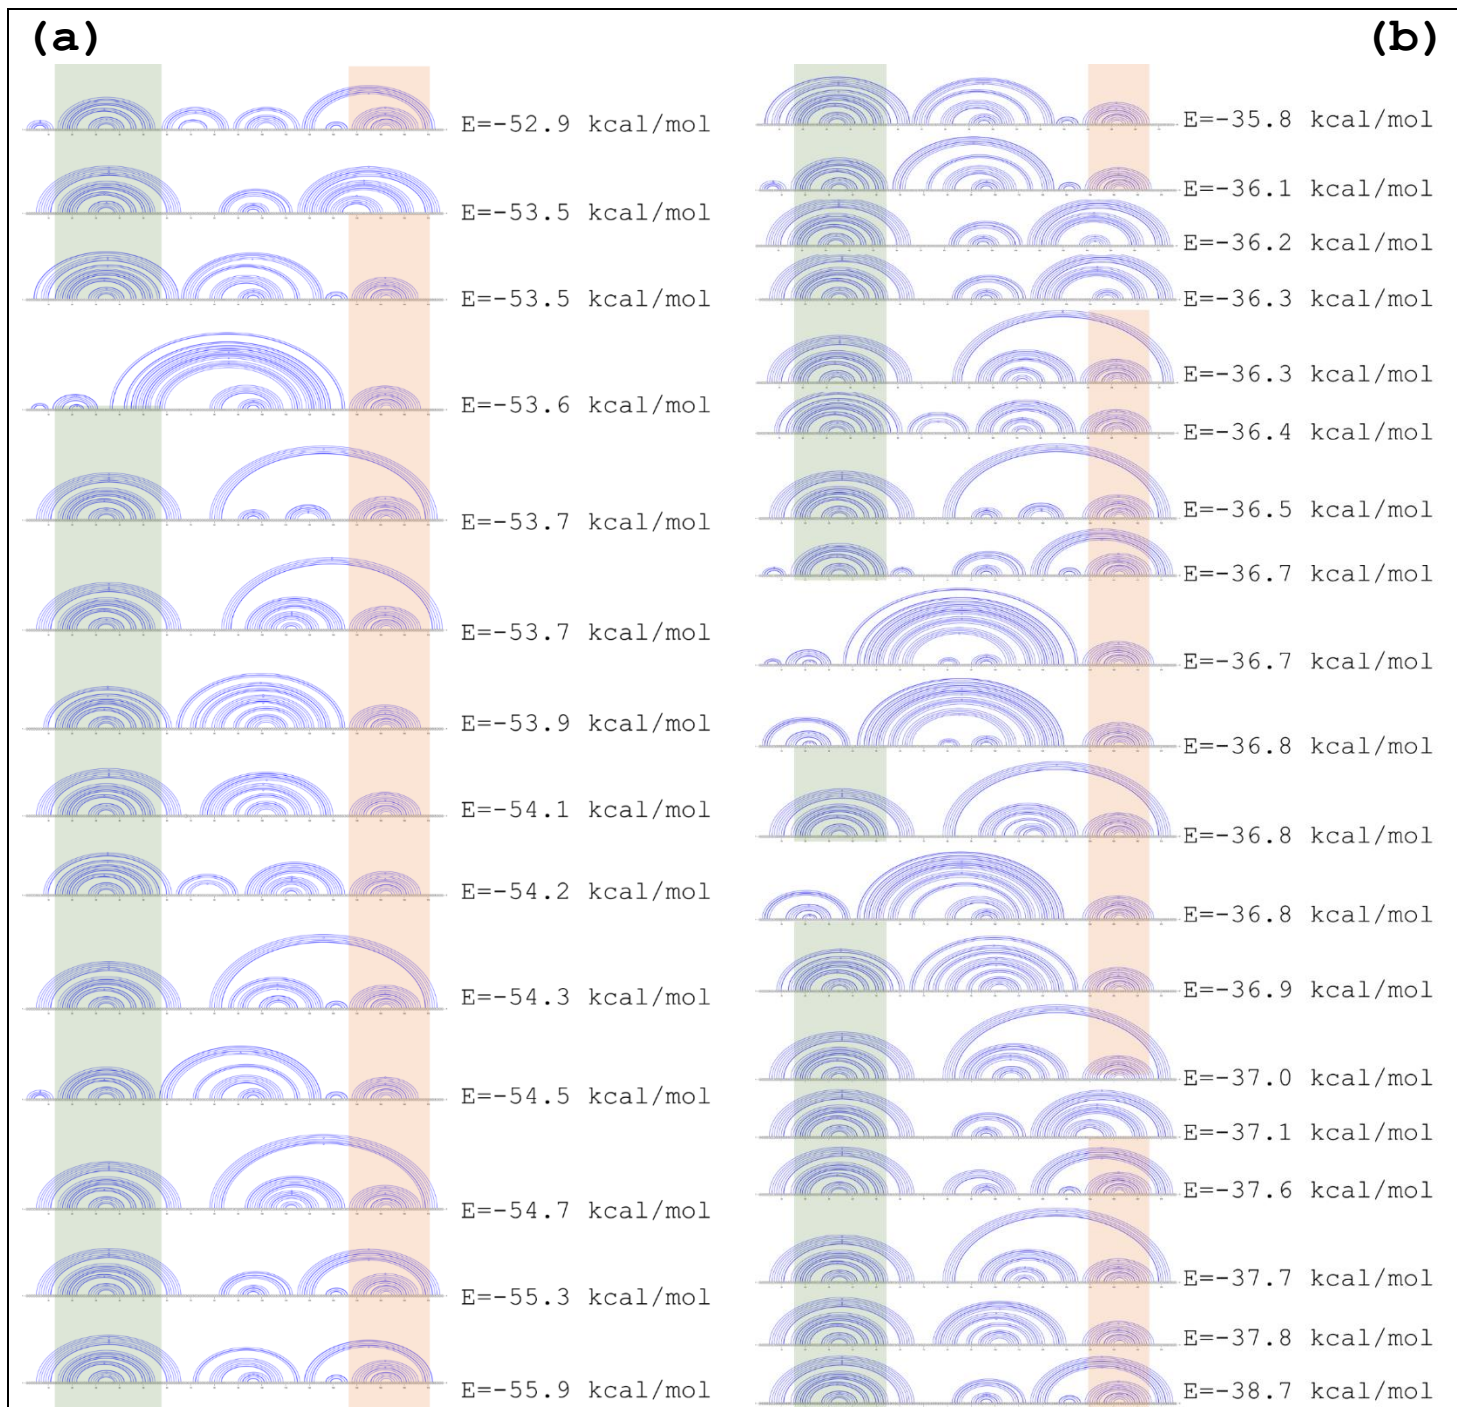

**Figure S5. Arc diagram of predicted MFE and suboptimal structures in an energy range of 3 kcal/mol for CrTER-B.** Calculations were performed with RNAStructure 6.3 using default parameters at (a) 293,15 K (20°C) and (b) 305,15 K (35°C). The two stem-loops involving high base pairing probabilities are highlighted (shadowed).

Probability  $\geq$  99%  
 99% > Probability  $\geq$  95%  
 95% > Probability  $\geq$  90%  
 90% > Probability  $\geq$  80%  
 80% > Probability  $\geq$  70%  
 70% > Probability  $\geq$  60%  
 60% > Probability  $\geq$  50%  
 50% > Probability

MEA structure  
308.15K

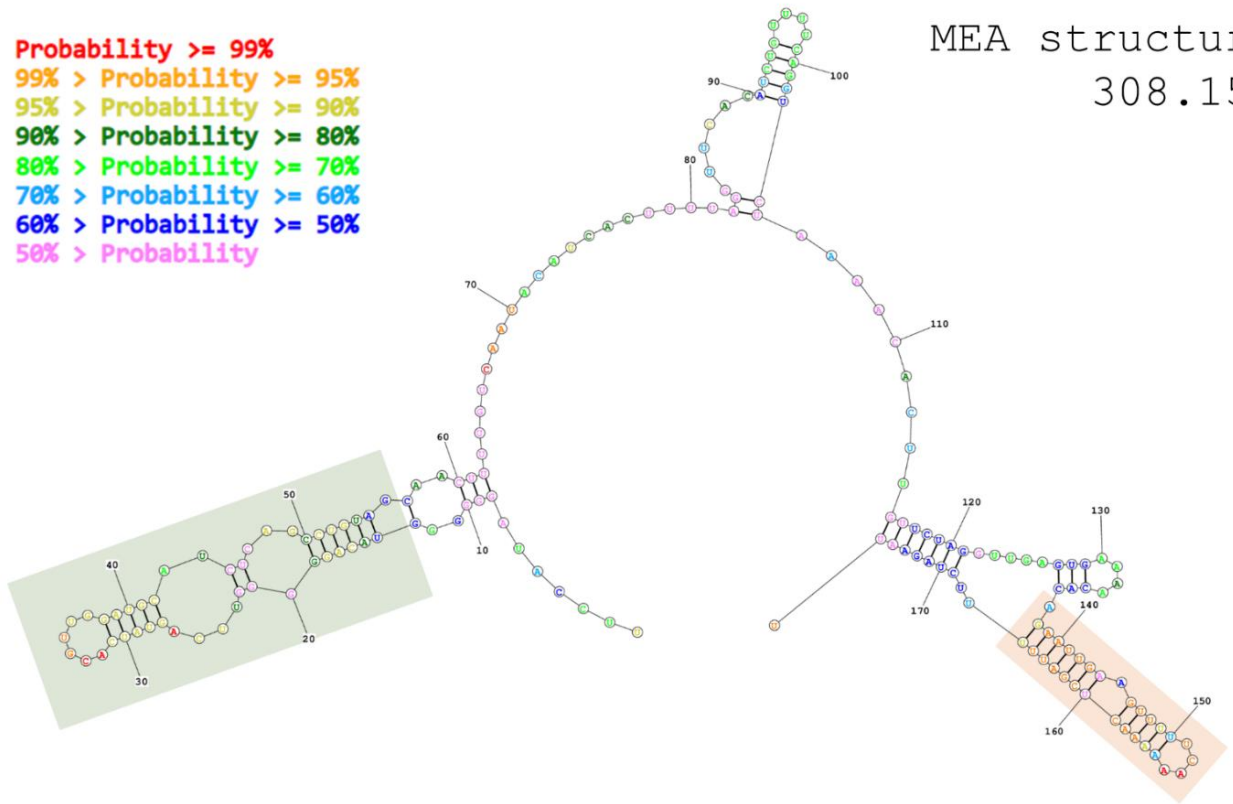

MEA structure  
293.15K

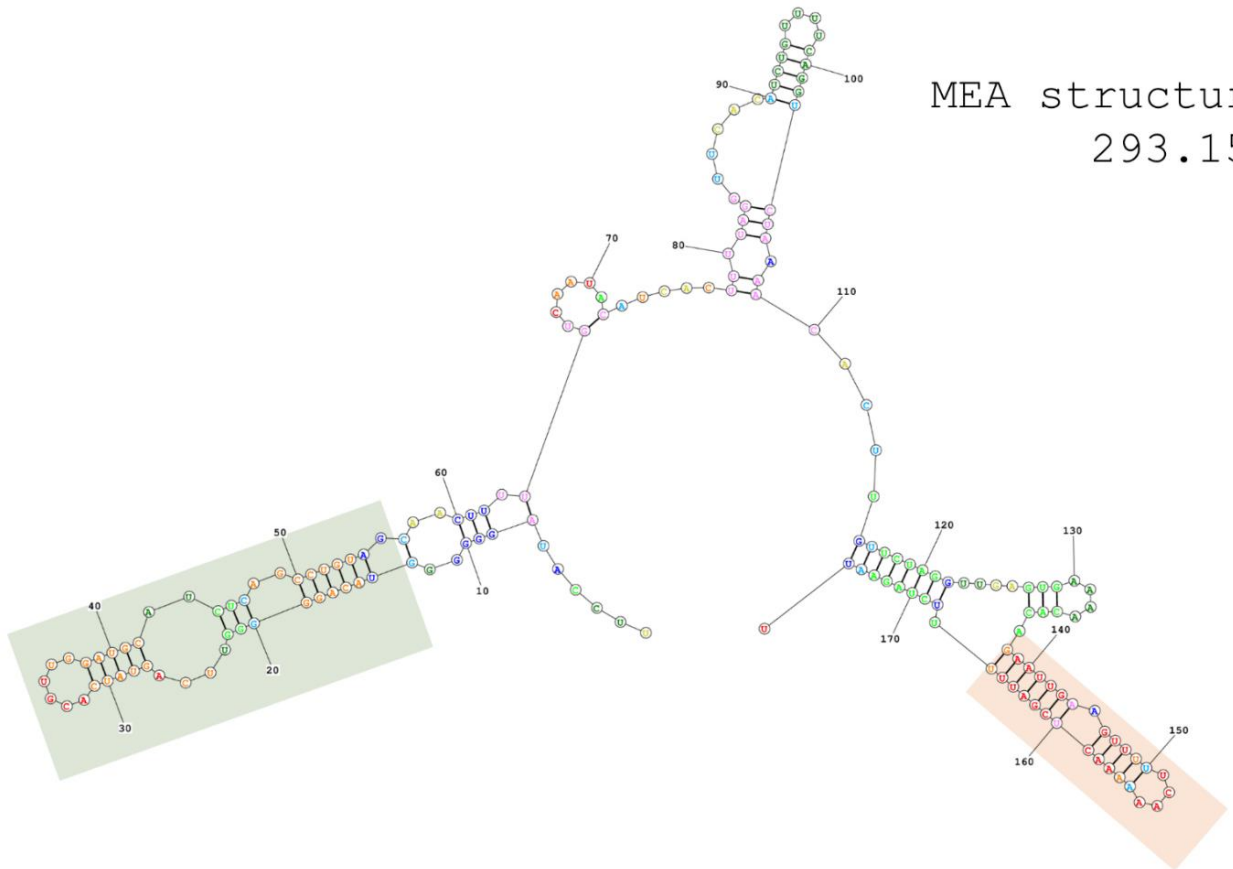

**Figure S6. The maximum expected accuracy (MEA) structure predicted for CriTER-B at 308,15 K (35°C) and 293,15 K (20°C).** Calculations were performed with RNAstructure 6.3 using default parameters. The two stem-loops involving high base pairing probabilities are highlighted (shadowed).

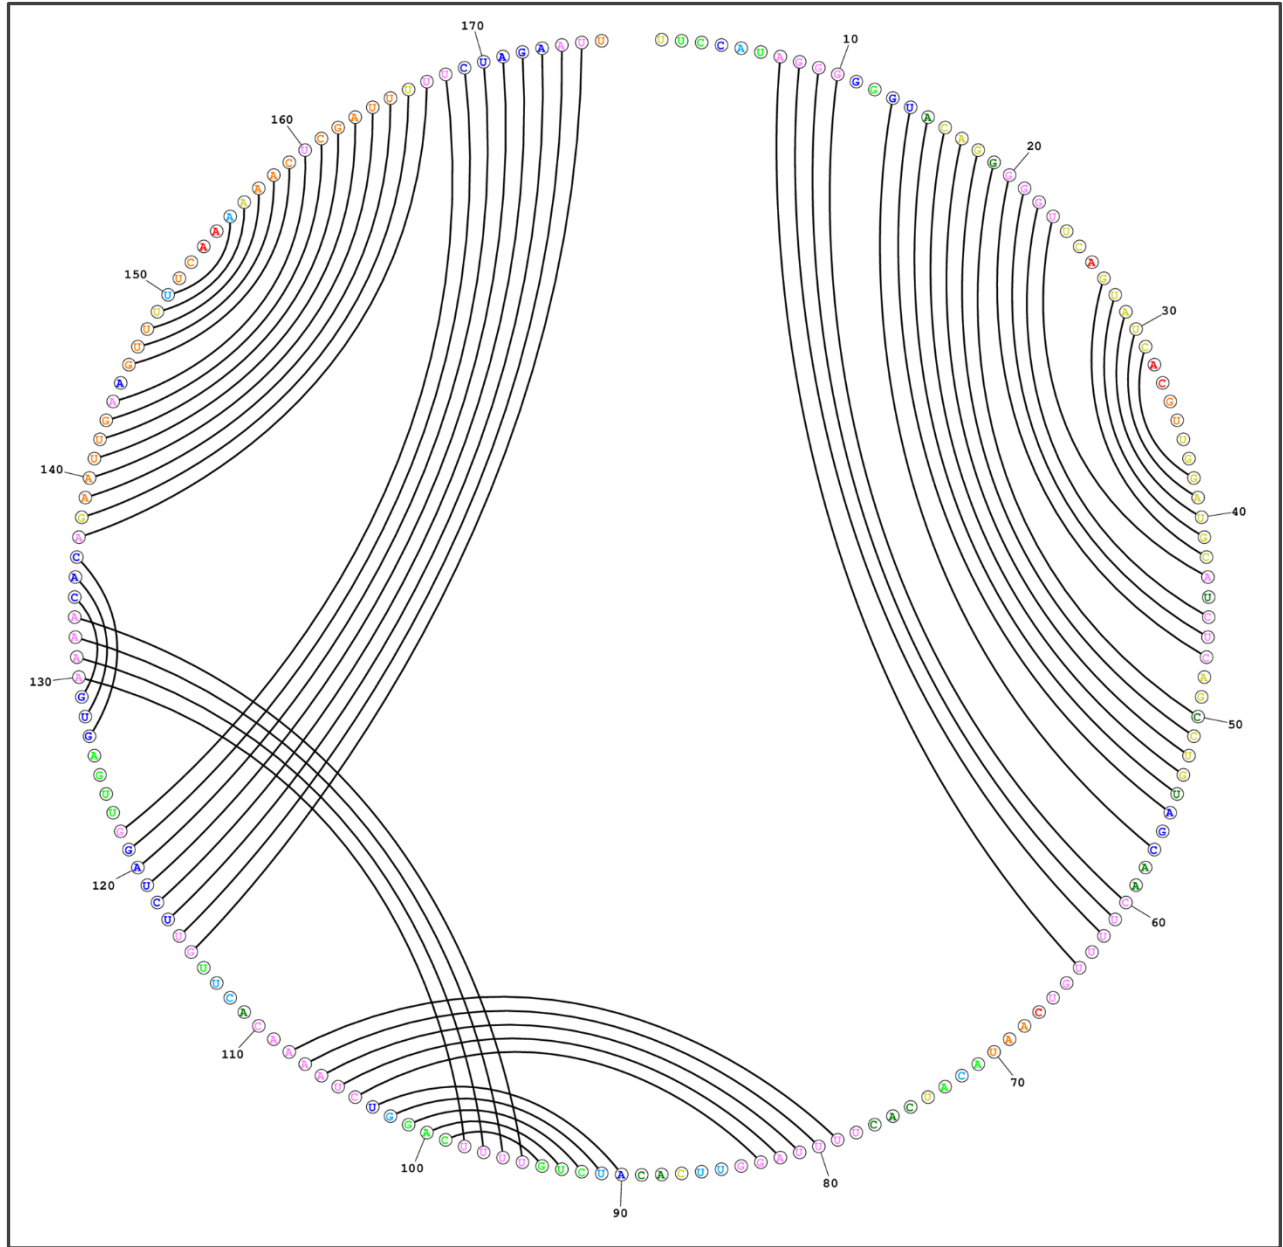

**Figure S7. Secondary structure circular representation of probable base pairs of CrITER-B, including putative pseudoknots.** Calculations were performed with RNAstructure 6.3 using default parameters.
